# Supplementary material for: Attention, cognitive control and motivation in ADHD: Linking event-related brain potentials and DNA methylation patterns in boys at early school age
Source: PubMed Central journal article supplement (PMC5476641; doi:10.1038/s41598-017-03326-3), 2017-06-19
Supplement: 41598_2017_3326_MOESM1_ESM.pdf [file 41598_2017_3326_MOESM1_ESM.pdf]

## Supplementary Material

### Attention, cognitive control and motivation in ADHD: Linking event-related brain potentials and DNA methylation patterns in boys at early school age

Hartmut Heinrich, Juliane Grunitz, Valeska Stonawski, Stefan Frey, Simone Wahl, Björn Albrecht, Tamme W. Goecke, Matthias W. Beckmann, Johannes Kornhuber, Peter A. Fasching, Gunther H. Moll, Anna Eichler

Table S-1: Performance and event-related potential (ERP) measures for the three groups of boys classified along their FBB-ADHS total score

Table S-2: Results of the DNA methylation analysis (less stringent statistical criteria) -> separate Excel file

Table S-3: Mean DNA methylation ( $\pm$  SD) for the three groups of boys classified along their FBB-ADHS total score

Table S-4: Additional analyses taking prenatal risk factors (maternal smoking, alcohol exposure, maternal depressive symptomatology) and medication into account

Figure S-1: Scatter plots (with regression lines) showing associations between DNA methylation and FBB-ADHS total scores

Figure S-2: Principal component analysis (PCA) before and after control probe adjustment

Table S-5: Candidate genes and number of CpGs

Table S-6: Sample characteristics for three groups of boys classified along their FBB-ADHS total score

**Table S-1:** Performance and event-related potential (ERP) measures for the three groups of boys classified along their FBB-ADHS total score: Controls ( $\leq 0.5$ ); ADHD-low: ( $> 0.5 / \leq 1$ ); ADHD-high ( $> 1$ ). Mean values  $\pm$  standard deviations for those measures being associated with the FBB-ADHS total score are presented. Comparing Controls vs. ADHD-high using t-tests revealed significant results for all measures. Abbreviations: w/o = without; dRTVar = difference of reaction time variability between blocks with and without motivational incentives.

|                                | Controls (N = 40) |                  | ADHD-low (N = 29) |                  | ADHD-high (N = 13) |                  |
|--------------------------------|-------------------|------------------|-------------------|------------------|--------------------|------------------|
|                                | w/o incentives    | incentives       | w/o incentives    | incentives       | w/o incentives     | incentives       |
| Reaction time variability (ms) | 117.3 $\pm$ 48.9  | 104.4 $\pm$ 34.4 | 114.8 $\pm$ 50.3  | 100.8 $\pm$ 32.2 | 150.4 $\pm$ 58.9   | 107.1 $\pm$ 38.4 |
| Cue-P3 (Pz, $\mu$ V)           | 10.3 $\pm$ 3.6    | 10.9 $\pm$ 3.6   | 8.7 $\pm$ 3.7     | 8.9 $\pm$ 4.0    | 7.4 $\pm$ 3.6      | 8.2 $\pm$ 3.4    |
| Nogo-P3                        |                   |                  |                   |                  |                    |                  |
| CPz ( $\mu$ V)                 | 16.8 $\pm$ 5.8    | 16.8 $\pm$ 4.4   | 15.5 $\pm$ 6.1    | 15.2 $\pm$ 5.3   | 12.1 $\pm$ 3.6     | 12.3 $\pm$ 5.7   |
| Pz ( $\mu$ V)                  | 15.1 $\pm$ 5.9    | 15.6 $\pm$ 4.5   | 14.6 $\pm$ 5.8    | 14.5 $\pm$ 5.9   | 11.1 $\pm$ 4.5     | 12.3 $\pm$ 6.4   |

| Performance and ERP measures | Comparisons of Controls and ADHD-high (t-tests) |           |
|------------------------------|-------------------------------------------------|-----------|
| dRTVar (ms)                  | t(51) = -2.29                                   | p = 0.026 |
| Cue-P3 (Pz)                  | t(51) = 2.74                                    | p = 0.008 |
| Nogo-P3 (CPz)                | t(51) = 3.21                                    | p = 0.002 |

**Table S-3:** Mean DNA methylation  $\pm$  SD (residuals of the preprocessing regression analysis) for the three groups of boys classified along their FBB-ADHS total score: Controls ( $\leq 0.5$ ); ADHD-low: ( $> 0.5 / \leq 1$ ); ADHD-high ( $> 1$ ). Only CpG sites are included that fulfilled our statistical criteria (inter alia significant associations with the behavioural and functional level). Comparing Controls vs. ADHD-high using t-tests revealed significant results for all CpGs.

| Gene – CpG                | Controls<br>(N=31)   | ADHD-low<br>(N=25)   | ADHD-high<br>(N=11)  |
|---------------------------|----------------------|----------------------|----------------------|
| <i>COMT</i> - cg08289189  | -0.0295 $\pm$ 0.0652 | 0.0145 $\pm$ 0.0857  | 0.0566 $\pm$ 0.0611  |
| <i>ANKK1</i> - cg15946653 | -0.0074 $\pm$ 0.0240 | 0.0047 $\pm$ 0.0195  | 0.0109 $\pm$ 0.0282  |
| <i>BDNF</i> - cg11806762  | 0.0250 $\pm$ 0.0450  | -0.0016 $\pm$ 0.0621 | -0.0276 $\pm$ 0.0534 |
| <i>NGFR</i> - cg04613258  | -0.0149 $\pm$ 0.0251 | 0.0070 $\pm$ 0.0296  | 0.0183 $\pm$ 0.0287  |
| <i>DPP10</i> - cg19651219 | -0.0176 $\pm$ 0.0412 | 0.0065 $\pm$ 0.0582  | 0.0328 $\pm$ 0.0698  |
| <i>TPH2</i> - cg14791008  | -0.0221 $\pm$ 0.0608 | 0.0097 $\pm$ 0.0628  | 0.0507 $\pm$ 0.0570  |

| Gene – CpG                | Comparisons of Controls and ADHD-high<br>(t-tests) |            |
|---------------------------|----------------------------------------------------|------------|
| <i>COMT</i> - cg08289189  | t(36) = -3.64                                      | p = 0.0008 |
| <i>ANKK1</i> - cg15946653 | t(40) = -2.08                                      | p = 0.0436 |
| <i>BDNF</i> - cg11806762  | t(40) = 3.17                                       | p = 0.0029 |
| <i>NGFR</i> - cg04613258  | t(40) = -3.64                                      | p = 0.0008 |
| <i>DPP10</i> - cg19651219 | t(40) = -2.88                                      | p = 0.0064 |
| <i>TPH2</i> - cg14791008  | t(39) = -3.45                                      | p = 0.0013 |

**Table S-4:** Additional analyses taking prenatal risk factors (maternal smoking, alcohol exposure, maternal depressive symptomatology) and medication into account. For the linear regression models, coefficients  $\pm$  standard errors are presented.

**Linear regression analyses - prenatal risk factors as covariates**

| Gene – CpG                | Associations with<br>ADHD total score | Nogo-P3                            |
|---------------------------|---------------------------------------|------------------------------------|
| <i>COMT</i> - cg08289189  | 0.0401 $\pm$ 0.0139, p = 0.0053       | -0.0065 $\pm$ 0.0020, p = 0.0024   |
| <i>ANKK1</i> - cg15946653 | 0.0213 $\pm$ 0.0058, p = 0.0005       | -0.0017 $\pm$ 0.0006, p = 0.0072   |
| <i>BDNF</i> - cg11806762  | -0.0287 $\pm$ 0.0134, p = 0.0361      | 0.0043 $\pm$ 0.0013, p = 0.0022    |
| <i>NGFR</i> - cg04613258  | 0.0204 $\pm$ 0.0077, p = 0.0098       | -0.0019 $\pm$ 0.0008, p = 0.0179   |
|                           |                                       | Cue-P3                             |
| <i>DPP10</i> - cg19651219 | 0.0401 $\pm$ 0.0139, p = 0.0053       | -0.0057 $\pm$ 0.0018, p = 0.0019   |
|                           |                                       | dRTVar                             |
| <i>TPH2</i> - cg14791008  | 0.0550 $\pm$ 0.0156, p = 0.0008       | -4.8e-04 $\pm$ 1.6e-04, p = 0.0045 |

**Correlation analyses - excluding participants receiving methylphenidate (MPH, N = 4)**

| Gene - CpG                | Associations with<br>ADHD total score | Nogo-P3                  |
|---------------------------|---------------------------------------|--------------------------|
| <i>COMT</i> - cg08289189  | r = 0.365, p = 0.0045                 | r = -0.341, p = 0.0083   |
| <i>ANKK1</i> - cg15946653 | r = 0.367, p = 0.0031                 | r = -0.306, p = 0.0147   |
| <i>BDNF</i> - cg11806762  | r = -0.202, p = 0.1125                | r = 0.376, p = 0.0024    |
| <i>NGFR</i> - cg04613258  | r = 0.290, p = 0.0213                 | r = -0.28134, p = 0.0256 |
|                           |                                       | Cue-P3                   |
| <i>DPP10</i> - cg19651219 | r = 0.367, p = 0.0031                 | r = -0.361, p = 0.0037   |
|                           |                                       | dRTVar                   |
| <i>TPH2</i> - cg14791008  | r = 0.405, p = 0.0012                 | r = -0.378, p = 0.0027   |

**Figure S-1:** Scatter plots (with regression lines) showing associations between DNA methylation and the FBB-ADHS total score. 5 of the 6 CpGs were hypermethylated in boys with higher ADHD scores. It has to be noted that DNA methylation is depicted as residuals which are centered at 0. FBB-ADHS: German ADHD rating scale.

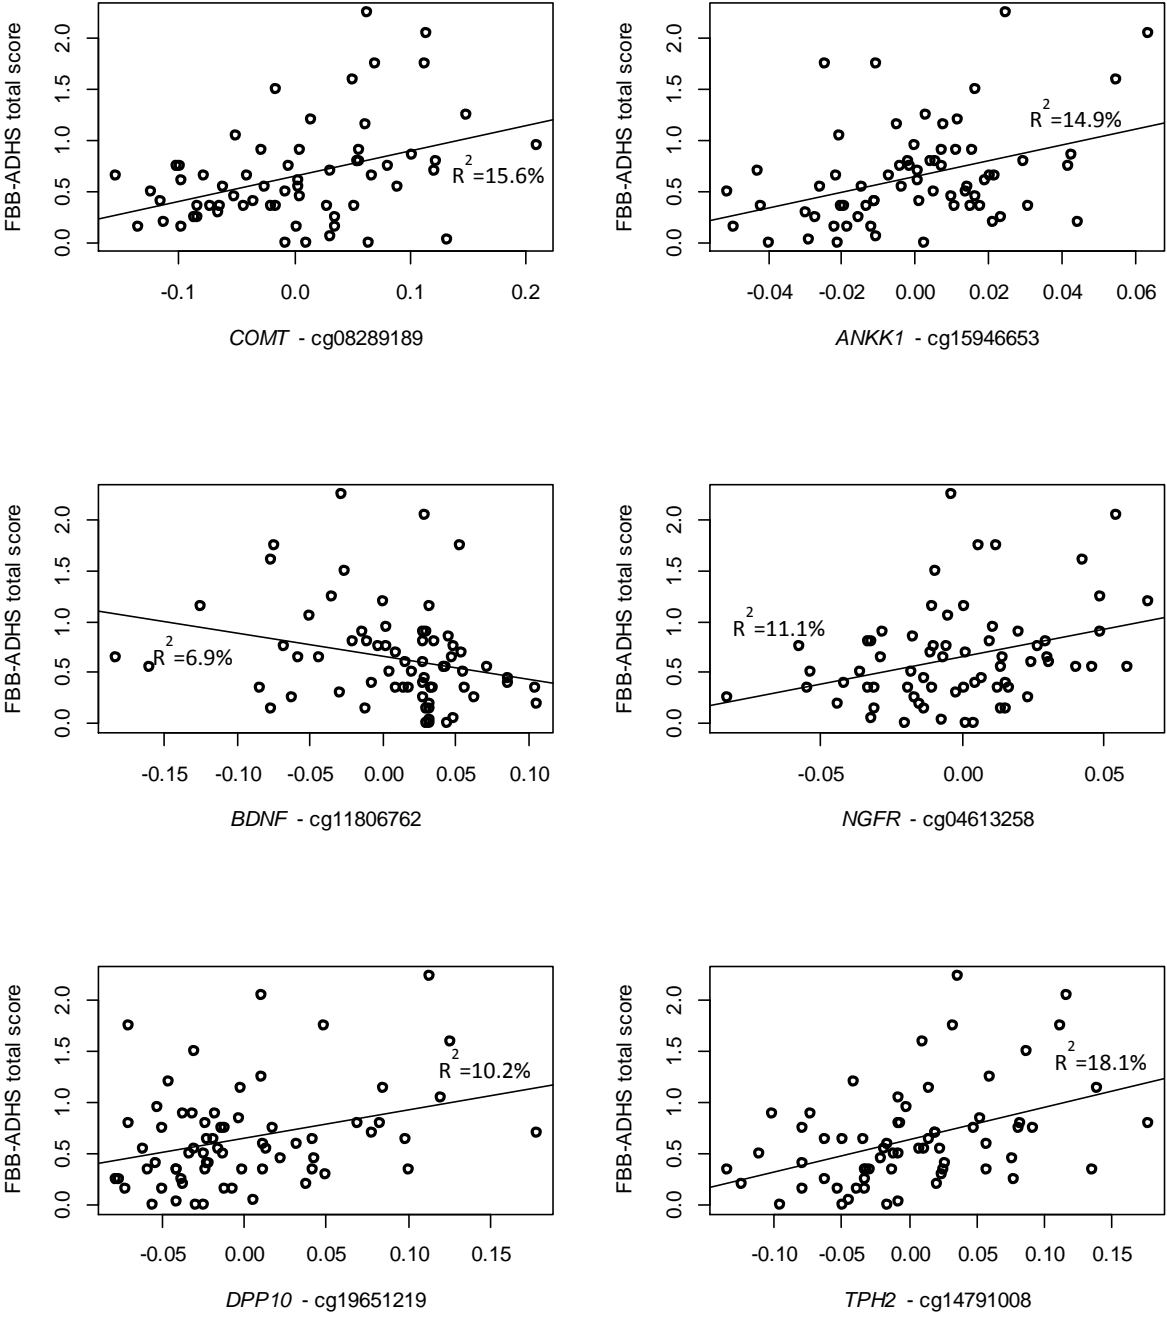



**Table S-5: Candidate genes and number of CpGs**

60 candidate genes (comprising 2031 CpGs) were included in the analysis. All CpGs linked to those candidate genes as defined in the HumanMethylation450K Manifest File (v.1.2) except probes containing SNPs and virtually showing no variance (i.e., mean beta values below 0.01 or above 0.99) were considered.

| <b>Genes</b>       | <b>no. CpGs</b> | <b>Genes</b>                          | <b>no. CpGs</b> |
|--------------------|-----------------|---------------------------------------|-----------------|
| <i>DRD1</i>        | 8               | <i>NTRK2</i>                          | 14              |
| <i>DRD2</i>        | 16              | <i>NTRK3</i>                          | 30              |
| <i>DRD3</i>        | 9               | <i>CDH13</i>                          | 51              |
| <i>DRD4</i>        | 17              | <i>GFOD1</i>                          | 38              |
| <i>DRD5</i>        | 12              | <i>MTA3</i>                           | 13              |
| <i>DAT1/SLC6A3</i> | 45              | <i>SPATA13</i>                        | 42              |
| <i>COMT</i>        | 29              | <i>UNC5B</i>                          | 26              |
| <i>ANKK1</i>       | 10              | <i>ASTN2</i>                          | 24              |
| <i>DDC</i>         | 34              | <i>CSMD2</i>                          | 68              |
| <i>DBH</i>         | 8               | <i>ITGAE</i>                          | 32              |
| <i>NET1/SLC6A2</i> | 16              | <i>ITGA11</i>                         | 28              |
| <i>ADRA2A</i>      | 11              | <i>CDH23</i>                          | 98              |
| <i>ADRA2C</i>      | 9               | <i>GPC6</i>                           | 63              |
| <i>ADRA1A</i>      | 17              | <i>CTNNA2</i>                         | 76              |
| <i>ADRA1B</i>      | 17              | <i>NAV2</i>                           | 114             |
| <i>ADRB1</i>       | 7               | <i>KCNIP4</i>                         | 45              |
| <i>ADRB2</i>       | 8               | <i>KCNIP1</i>                         | 35              |
| <i>SLC6A4</i>      | 15              | <i>DPP10</i>                          | 45              |
| <i>HTR1B</i>       | 10              | <i>FHIT</i>                           | 55              |
| <i>HTR2A</i>       | 21              | <i>KCNC1</i>                          | 26              |
| <i>TPH2</i>        | 19              | <i>SNAP25</i>                         | 16              |
| <i>BDNF</i>        | 50              | <i>CHRNA4</i>                         | 18              |
| <i>NGF</i>         | 23              | <i>SLC9A9</i>                         | 20              |
| <i>NGFR</i>        | 24              | <i>SUCNR1</i>                         | 21              |
| <i>NTF3</i>        | 36              | <i>NOS1</i>                           | 20              |
| <i>NTF4</i>        | 6               | <i>GRIN1</i>                          | 31              |
| <i>CNTF</i>        | 23              | <i>GRIN2A, GRIN2B, GRIN2C, GRIN2D</i> | 134             |
| <i>CNTFR</i>       | 12              | <i>GRIN3A, GRIN3B</i>                 | 25              |
| <i>GDNF</i>        | 39              | <i>MYT1L</i>                          | 155             |
| <i>NTRK1</i>       | 46              | <i>VIPR2</i>                          | 71              |

**Table S-6:** Sample characteristics for the three groups of boys classified along their FBB-ADHS total score: controls ( $\leq 0.5$ ); ADHD-low: ( $> 0.5 / \leq 1$ ); ADHD-high ( $> 1$ ). The groups did not differ significantly regarding age, IQ, socioeconomic status and absence or presence of prenatal maternal smoking and prenatal maternal depressive symptomatology. There was a tendency regarding prenatal alcohol exposure (higher probability in the ADHD-high group).

|                                 | Controls        | ADHD-low         | ADHD-high        | Statistics                 |
|---------------------------------|-----------------|------------------|------------------|----------------------------|
| N                               | 40              | 29               | 13               |                            |
| Age (years)                     | 7.58 $\pm$ 0.52 | 7.52 $\pm$ 0.68  | 7.45 $\pm$ 0.43  | F(2,79) = 0.24, n.s.       |
| IQ                              | 105.4 $\pm$ 8.1 | 104.5 $\pm$ 11.6 | 101.3 $\pm$ 10.7 | F(2,79) = 0.87, n.s.       |
| Socioeconomic status            | 11.6 $\pm$ 1.8  | 11.5 $\pm$ 2.0   | 10.5 $\pm$ 2.3   | F(2,79) = 1.59, n.s.       |
| ADHD rating scale - total score | 0.29 $\pm$ 0.14 | 0.72 $\pm$ 0.12  | 1.55 $\pm$ 0.39  | F(2,79) = 207.9, p<0.001   |
| Prenatal risk factors:          |                 |                  |                  |                            |
| Maternal smoking                | 3 (7.5%)        | 7 (24.1%)        | 2 (15.4%)        | $\chi^2 = 3.73$ , p = n.s. |
| Alcohol exposure                | 7 (17.5%)       | 5 (17.2%)        | 6 (46.2%)        | $\chi^2 = 5.28$ , p = 0.07 |
| Maternal depressive symptoms    | 5 (12.5%)       | 4 (13.8%)        | 3 (23.1%)        | $\chi^2 = 0.90$ , n.s.     |
